# Supplementary material for: Local delivery of HMGB1 in gelatin sponge scaffolds combined with mesenchymal stem cell sheets to accelerate fracture healing
Source: PubMed Central journal article supplement (PMC5522052; doi:10.18632/oncotarget.16887), 2017-04-06
Supplement: oncotarget-08-42098-s001.pdf [file oncotarget-08-42098-s001.pdf]

# Local delivery of HMGB1 in gelatin sponge scaffolds combined with mesenchymal stem cell sheets to accelerate fracture healing

## Supplementary Materials

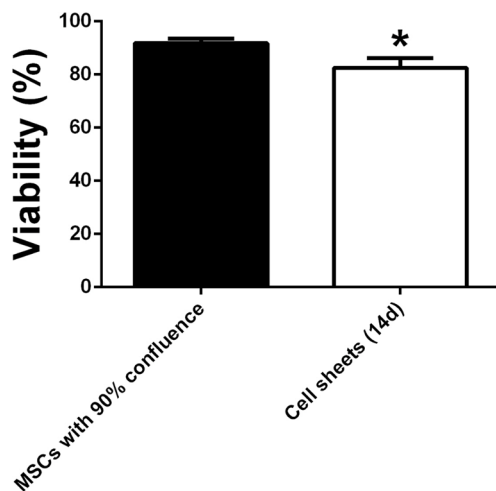

Supplementary Figure 1: The cell viability of the cell sheets and MSCs with 90% confluence.

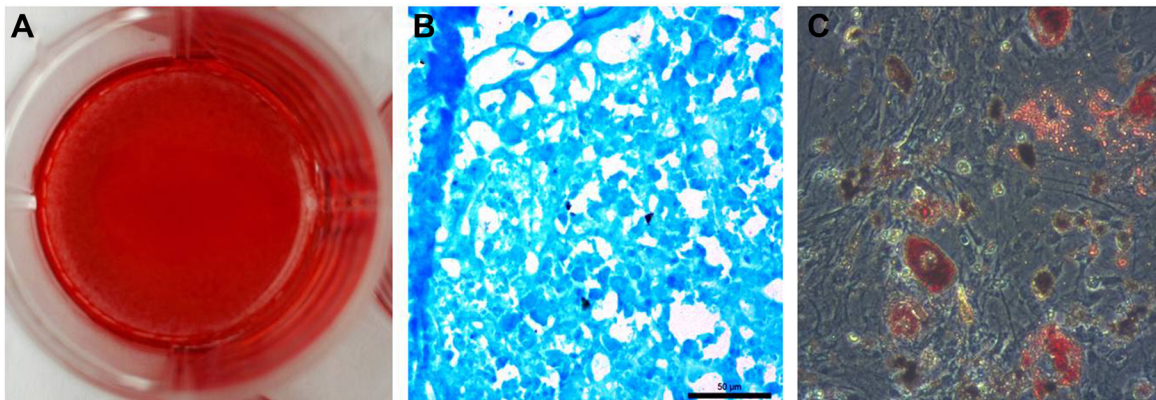

Supplementary Figure 2: (A) Alizarin red, (B) Alcian blue, and (C) oil red O staining of the cell sheet.
